# Supplementary material
Source: publisher figshare collection journal article supplement (https://gsapubs.figshare.com/ndownloader/files/24711641)
Supplement: Supplementary file 1 [file 24711641]

## Sheet: Apatite Age Data
Sample Number		11 CAT 01 Apatite
Area of Graticule Square		6.4e-07	cm2
No. of Crystals		40
Zeta Factor ± Error		368.1	14.9
Rho d (% Relative Error)		1329000	1.53375
N d		4251
N s	N i	N g	Dpar	Dper	Rho s	Rho i	Rho s / Rho i	U ppm	Age (Ma)	Age error
17	72	42	2.38	0.61	632440	2.67857e+06	0.236111	30.2322	57.4962	15.7025
28	81	24	2.1	0.45	1.82292e+06	5.27344e+06	0.345679	59.5196	84.0042	18.7715
4	34	36	3.88	1.38	173611	1.47569e+06	0.117647	16.6557	28.7127	15.2282
38	114	28	2.14	0.41	2.12054e+06	6.36161e+06	0.333333	71.8014	81.0228	15.5769
3	24	40	2.72	0.94	117188	937500	0.125	10.5813	30.503	18.7258
21	50	24	1.86	0.47	1.36719e+06	3.25521e+06	0.42	36.7405	101.923	26.8684
6	32	30	2.68	0.88	312500	1.66667e+06	0.1875	18.8111	45.7006	20.4272
44	123	30	1.85	0.42	2.29167e+06	6406250	0.357724	72.3053	86.9115	15.7238
20	58	16	1.89	0.55	1953125	5.66406e+06	0.344828	63.9285	83.7986	22.0305
15	49	12	2.07	0.42	1.95312e+06	6.38021e+06	0.306122	72.0114	74.4468	22.2032
6	46	49	3.46	1.17	191327	1.46684e+06	0.130435	16.5557	31.826	13.8828
6	30	60	2.14	0.55	156250	781250	0.2	8.81772	48.7358	21.8972
29	82	24	2.29	0.61	1.88802e+06	5.33854e+06	0.353659	60.2544	85.9305	18.9343
13	37	25	2.6	0.82	812500	2312500	0.351351	26.1005	85.3736	27.7725
10	45	36	2.11	0.59	434028	1953125	0.222222	22.0443	54.1282	19.0679
8	37	56	2.56	0.88	223214	1.03237e+06	0.216216	11.652	52.6713	20.663
111	345	100	2.29	0.6	1734375	5390625	0.321739	60.8423	78.2217	9.18273
6	41	49	2.38	0.62	191327	1.3074e+06	0.146341	14.7562	35.6965	15.6793
4	23	28	3.29	1.25	223214	1.28348e+06	0.173913	14.4863	42.3998	23.0427
9	40	40	2.61	0.86	351562	1562500	0.225	17.6354	54.8019	20.3569
5	30	36	2.37	0.73	217014	1.30208e+06	0.166667	14.6962	40.6387	19.709
13	40	42	3.52	0.95	483631	1.4881e+06	0.325	16.7957	79.0096	25.4549
46	106	49	1.66	0.54	1.46684e+06	3.3801e+06	0.433962	38.1501	105.284	19.1393
11	66	64	1.71	0.43	268555	1.61133e+06	0.166667	18.1865	40.6387	13.3512
15	52	20	2.09	0.67	1171875	4062500	0.288462	45.8521	70.175	20.7902
39	107	24	2.21	0.62	2.53906e+06	6.96615e+06	0.364486	78.6247	88.5433	16.9995
5	25	30	1.79	0.52	260417	1.30208e+06	0.2	14.6962	48.7358	23.9686
71	237	49	1.9	0.39	2.26403e+06	7.5574e+06	0.299578	85.2979	72.8642	10.3502
17	63	80	3.09	1.11	332031	1.23047e+06	0.269841	13.8879	65.6682	18.1713
24	60	30	1.96	0.4	1250000	3125000	0.4	35.2709	97.1059	23.827
14	43	20	2.14	0.5	1093750	3359375	0.325581	37.9162	79.1501	24.5949
8	29	30	2.27	0.6	416667	1.51042e+06	0.275862	17.0476	67.1258	26.9639
9	38	80	2.82	0.91	175781	742188	0.236842	8.37683	57.6734	21.5254
24	82	24	1.8	0.53	1.5625e+06	5.33854e+06	0.292683	60.2544	71.1964	16.8083
34	131	30	1.99	0.58	1.77083e+06	6.82292e+06	0.259542	77.0081	63.174	12.4629
5	24	24	3.69	1.41	325521	1.5625e+06	0.208333	17.6354	50.7585	25.0492
36	121	24	1.63	0.44	2.34375e+06	7.8776e+06	0.297521	88.912	72.3666	14.0912
8	36	64	2.91	1.04	195312	878906	0.222222	9.91994	54.1282	21.2863
13	61	20	1.89	0.53	1015625	4765625	0.213115	53.7881	51.9188	16.0184
16	55	70	2.99	0.82	357143	1.22768e+06	0.290909	13.8564	70.7672	20.3332
**********	**********	**********	**********	**********	**********	**********	**********	**********	**********	**********
811	2769	1559	2.39325	0.705	812821	2.77522e+06	0.292886	31.323	71.2454	4.19556
Pooled Ratio		0.292886	±	0.0172477
Mean Ratio		0.266302	±	0.0131424
Pooled Age		71.2454	±	4.19556	1 S.E.
Mean Crystal Age		64.8113	±	3.21387	1 S.E.
Binomial Age		71.3121	+	5.72629	"+95%"
			-	5.4828	"-95%"
Central Age		71.131	±	4.21328
Age Dispersion		2.86379	%
Chi-squared		39.5114	with	39	degrees of freedom
P (Chi-Sq)		44.7039	%
Sample Number		11 CAT 02 Apatite
Area of Graticule Square		6.4e-07	cm2
No. of Crystals		4
Zeta Factor ± Error		368.1	14.9
Rho d (% Relative Error)		1317000	1.54065
N d		4213
N s	N i	N g	Dpar	Dper	Rho s	Rho i	Rho s / Rho i	U ppm	Age (Ma)	Age error
1	6	100	3.06	1.22	15625	93750	0.166667	1.06777	40.2729	43.5347
1	5	100	3.33	1.26	15625	78125	0.2	0.889806	48.2974	52.9485
4	23	70	2.1	0.61	89285.7	513393	0.173913	5.8473	42.0182	22.8354
3	3	80	1.9	0.52	58593.8	58593.8	1	0.667355	237.948	194.557
**********	**********	**********	**********	**********	**********	**********	**********	**********	**********	**********
9	37	350	2.5975	0.9025	40178.6	165179	0.243243	1.8813	58.6927	21.9619
Pooled Ratio		0.243243	±	0.0910178
Mean Ratio		0.385145	±	0.205077
Pooled Age		58.6927	±	21.9619	1 S.E.
Mean Crystal Age		92.6872	±	49.5186	1 S.E.
Binomial Age		63.6027	+	59.6082	"+95%"
			-	38.6273	"-95%"
Central Age		58.6946	±	21.9641
Age Dispersion		0.631446	%
Chi-squared		4.07471	with	3	degrees of freedom
P (Chi-Sq)		25.3509	%
Sample Number		11 CAT 03 Apatite
Area of Graticule Square		6.4e-07	cm2
No. of Crystals		42
Zeta Factor ± Error		368.1	14.9
Rho d (% Relative Error)		1305000	1.54765
N d		4175
N s	N i	N g	Dpar	Dper	Rho s	Rho i	Rho s / Rho i	U ppm	Age (Ma)	Age error
4	28	36	2.15	0.58	173611	1.21528e+06	0.142857	13.9687	34.2212	18.352
9	34	60	2.31	0.53	234375	885417	0.264706	10.1772	63.267	23.8744
12	45	70	3.59	1.2	267857	1.00446e+06	0.266667	11.5456	63.7333	20.8899
2	9	25	2.35	0.94	125000	562500	0.222222	6.46552	53.1547	41.6168
14	77	100	2.32	0.62	218750	1203125	0.181818	13.829	43.5228	12.7852
3	18	30	2.21	0.43	156250	937500	0.166667	10.7759	39.9071	24.9465
5	36	45	2.21	0.46	173611	1250000	0.138889	14.3678	33.273	15.9452
21	99	42	1.98	0.6	781250	3.68304e+06	0.212121	42.3337	50.7481	12.389
15	96	49	2.68	0.74	478316	3.06122e+06	0.15625	35.1865	37.4201	10.5151
33	143	100	1.84	0.56	515625	2234375	0.230769	25.6825	55.1904	10.9235
20	83	100	2.34	0.62	312500	1296875	0.240964	14.9066	57.6177	14.5678
19	76	49	2.02	0.53	605867	2.42347e+06	0.25	27.856	59.7684	15.5475
2	17	30	2.67	0.91	104167	885417	0.117647	10.1772	28.1953	21.1127
9	30	49	2.43	0.64	286990	956633	0.3	10.9958	71.6558	27.4099
9	33	50	2.49	0.72	281250	1031250	0.272727	11.8534	65.1745	24.6711
11	28	15	1.96	0.46	1.14583e+06	2.91667e+06	0.392857	33.5249	93.6746	33.5796
5	21	45	2.65	0.78	173611	729167	0.238095	8.38123	56.9348	28.4387
4	16	50	2.59	0.64	125000	500000	0.25	5.74713	59.7684	33.5118
28	138	49	2.08	0.48	892857	4.40051e+06	0.202899	50.5806	48.55	10.2805
8	39	70	3.56	0.94	178571	870536	0.205128	10.0062	49.0814	19.1681
10	39	64	2.84	1.1	244141	952148	0.25641	10.9442	61.2936	21.8878
8	30	50	2.35	0.58	250000	937500	0.266667	10.7759	63.7333	25.5102
3	16	60	2.68	0.69	78125	416667	0.1875	4.78927	44.8782	28.3021
5	26	60	2.44	0.68	130208	677083	0.192308	7.78257	46.0248	22.5634
13	40	49	2.49	0.77	414541	1.27551e+06	0.325	14.661	77.5914	24.9985
8	51	60	2.69	0.83	208333	1328125	0.156863	15.2658	37.5664	14.378
3	12	49	2.54	0.74	95663.3	382653	0.25	4.39831	59.7684	38.6672
5	21	42	2.36	0.7	186012	781250	0.238095	8.97989	56.9348	28.4387
9	44	70	2.31	0.69	200893	982143	0.204545	11.289	48.9425	18.0303
3	16	25	2.58	0.85	187500	1000000	0.1875	11.4943	44.8782	28.3021
7	31	50	2.49	0.72	218750	968750	0.225806	11.1351	54.0085	22.7217
23	105	50	2.57	0.7	718750	3281250	0.219048	37.7155	52.3985	12.2751
9	29	49	2.19	0.63	286990	924745	0.310345	10.6293	74.1126	28.4608
25	97	64	2.33	0.62	610352	2.36816e+06	0.257732	27.2203	61.6081	14.0741
33	127	100	3.7	1.1	515625	1984375	0.259843	22.8089	62.1102	12.4306
7	44	60	3.26	0.96	182292	1.14583e+06	0.159091	13.1705	38.0985	15.5907
5	32	25	2.26	0.68	312500	2000000	0.15625	22.9885	37.4201	18.0677
9	36	48	2.97	0.84	292969	1.17187e+06	0.25	13.4698	59.7684	22.4244
6	38	80	2.6	0.82	117188	742188	0.157895	8.53089	37.8129	16.6917
33	139	100	2.38	0.56	515625	2171875	0.23741	24.9641	56.7717	11.2653
10	36	60	1.96	0.48	260417	937500	0.277778	10.7759	66.3752	23.9002
15	68	60	2.16	0.64	390625	1.77083e+06	0.220588	20.3544	52.7655	15.2245
**********	**********	**********	**********	**********	**********	**********	**********	**********	**********	**********
482	2143	2339	2.49	0.708571	321986	1.43157e+06	0.224918	16.4548	53.797	3.57631
Pooled Ratio		0.224918	±	0.0149521
Mean Ratio		0.224999	±	0.00859002
Pooled Age		53.797	±	3.57631	1 S.E.
Mean Crystal Age		53.8162	±	2.06287	1 S.E.
Binomial Age		53.8794	+	5.5067	"+95%"
			-	5.2253	"-95%"
Central Age		53.797	±	3.57631
Age Dispersion		0.000361994	%
Chi-squared		16.6453	with	41	degrees of freedom
P (Chi-Sq)		99.9742	%
Sample Number		11 CAT 04 Apatite
Area of Graticule Square		6.4e-07	cm2
No. of Crystals		20
Zeta Factor ± Error		368.1	14.9
Rho d (% Relative Error)		1293000	1.55474
N d		4137
N s	N i	N g	Dpar	Dper	Rho s	Rho i	Rho s / Rho i	U ppm	Age (Ma)	Age error
3	46	25	2.07	0.66	187500	2875000	0.0652174	33.3527	15.5016	9.26149
4	64	16	1.96	0.6	390625	6250000	0.0625	72.5058	14.8564	7.68387
13	155	36	1.92	0.51	564236	6.72743e+06	0.083871	78.0444	19.9285	5.81881
7	95	24	1.85	0.57	455729	6.1849e+06	0.0736842	71.7505	17.5113	6.90007
6	70	16	1.65	0.43	585938	6.83594e+06	0.0857143	79.3032	20.3658	8.7082
12	134	20	1.81	0.51	937500	10468750	0.0895522	121.447	21.2762	6.47706
2	45	30	1.72	0.41	104167	2343750	0.0444444	27.1897	10.5681	7.65075
8	111	20	1.51	0.4	625000	8671875	0.0720721	100.602	17.1287	6.31418
7	109	24	2.01	0.5	455729	7.09635e+06	0.0642202	82.3243	15.2648	5.98863
9	125	32	1.9	0.51	439453	6.10352e+06	0.072	70.8064	17.1116	5.95206
5	66	20	1.94	0.43	390625	5156250	0.0757576	59.8173	18.0034	8.38717
16	180	28	1.99	0.53	892857	1.00446e+07	0.0888889	116.527	21.1188	5.58496
4	55	25	1.62	0.45	250000	3437500	0.0727273	39.8782	17.2842	8.98217
18	177	28	1.7	0.48	1.00446e+06	9.87723e+06	0.101695	114.585	24.1557	6.06714
17	194	80	1.92	0.47	332031	3.78906e+06	0.0876289	43.9566	20.82	5.343
28	313	64	1.89	0.56	683594	7.6416e+06	0.0894569	88.6497	21.2536	4.29245
9	132	30	1.94	0.35	468750	6875000	0.0681818	79.7564	16.2053	5.62693
20	206	60	1.8	0.41	520833	5.36458e+06	0.0970874	62.2341	23.0632	5.49343
20	219	80	1.81	0.57	390625	4.27734e+06	0.0913242	49.6212	21.6965	5.15475
7	107	35	1.66	0.51	312500	4.77679e+06	0.0654206	55.4151	15.5498	6.10383
**********	**********	**********	**********	**********	**********	**********	**********	**********	**********	**********
215	2603	693	1.8335	0.493	484758	5.86896e+06	0.082597	68.0854	19.6263	1.63211
Pooled Ratio		0.082597	±	0.00686874
Mean Ratio		0.0775722	±	0.00314825
Pooled Age		19.6263	±	1.63211	1 S.E.
Mean Crystal Age		18.434	±	0.749167	1 S.E.
Binomial Age		19.6895	+	2.86812	"+95%"
			-	2.68808	"-95%"
Central Age		19.6263	±	1.63211
Age Dispersion		1.33365e-06	%
Chi-squared		4.52968	with	19	degrees of freedom
P (Chi-Sq)		99.9726	%
Sample Number		11 CAT 05 Apatite
Area of Graticule Square		6.4e-07	cm2
No. of Crystals		39
Zeta Factor ± Error		368.1	14.9
Rho d (% Relative Error)		1281000	1.56212
N d		4098
N s	N i	N g	Dpar	Dper	Rho s	Rho i	Rho s / Rho i	U ppm	Age (Ma)	Age error
6	24	9	2.35	0.73	1.04167e+06	4.16667e+06	0.25	48.79	58.6742	26.9017
1	14	14	2.41	0.65	111607	1562500	0.0714286	18.2963	16.8186	17.4242
5	24	20	2.44	0.51	390625	1875000	0.208333	21.9555	48.9322	24.1484
4	25	15	1.84	0.42	416667	2.60417e+06	0.16	30.4938	37.6129	20.3208
2	9	18	1.68	0.37	173611	781250	0.222222	9.14813	52.1811	40.8547
1	9	28	1.89	0.42	55803.6	502232	0.111111	5.88094	26.1434	27.5809
8	50	30	1.65	0.39	416667	2.60417e+06	0.16	30.4938	37.6129	14.4153
4	42	16	1.77	0.39	390625	4.10156e+06	0.0952381	48.0277	22.4151	11.7694
3	46	25	2.37	0.64	187500	2875000	0.0652174	33.6651	15.3579	9.17567
4	36	30	2.04	0.6	208333	1875000	0.111111	21.9555	26.1434	13.8254
9	57	40	2.86	0.81	351562	2.22656e+06	0.157895	26.0722	37.1195	13.4112
4	21	16	2.1	0.78	390625	2.05078e+06	0.190476	24.0138	44.7525	24.4916
6	25	20	1.73	0.34	468750	1953125	0.24	22.8703	56.3374	25.7277
60	251	25	3.02	0.77	3750000	15687500	0.239044	183.694	56.114	8.42331
7	40	49	2.54	0.72	223214	1.27551e+06	0.175	14.9357	41.1279	16.9445
8	63	49	1.97	0.4	255102	2.00893e+06	0.126984	23.5238	29.8695	11.2856
40	400	16	2.24	0.46	3906250	39062500	0.1	457.406	23.5338	4.034
7	50	48	2.41	0.54	227865	1.6276e+06	0.14	19.0586	32.9233	13.363
2	13	16	2.46	0.61	195312	1.26953e+06	0.153846	14.8657	36.1703	27.5181
3	27	15	1.58	0.58	312500	2812500	0.111111	32.9333	26.1434	15.9507
4	20	12	2.36	0.6	520833	2.60417e+06	0.2	30.4938	46.982	25.8137
4	25	64	2	0.43	97656.2	610352	0.16	7.14697	37.6129	20.3208
6	51	50	1.51	0.39	187500	1593750	0.117647	18.6622	27.6779	12.0059
2	24	49	3.28	0.91	63775.5	765306	0.0833333	8.96143	19.6175	14.4631
10	49	35	1.74	0.38	446429	2187500	0.204082	25.6148	47.9372	16.7637
33	240	16	3.57	1.14	3.22266e+06	23437500	0.1375	274.444	32.3369	6.16543
9	59	35	2.44	0.96	401786	2.63393e+06	0.152542	30.8423	35.8647	12.9283
2	30	20	1.62	0.48	156250	2343750	0.0666667	27.4444	15.6987	11.485
2	21	60	1.48	0.43	52083.3	546875	0.0952381	6.40369	22.4151	16.6159
5	20	30	2.9	0.69	260417	1.04167e+06	0.25	12.1975	58.6742	29.4473
21	86	20	1.92	0.51	1640625	6718750	0.244186	78.6739	57.3157	14.1709
10	90	42	1.79	0.44	372024	3.34821e+06	0.111111	39.2063	26.1434	8.78797
9	44	25	2.54	0.56	562500	2750000	0.204545	32.2014	48.0458	17.7002
3	26	24	1.7	0.53	195312	1.69271e+06	0.115385	19.8209	27.1468	16.5946
8	50	15	1.77	0.39	833333	5.20833e+06	0.16	60.9875	37.6129	14.4153
12	47	42	1.91	0.59	446429	1.74851e+06	0.255319	20.4744	59.9168	19.5528
13	60	40	2.71	0.81	507812	2343750	0.216667	27.4444	50.8817	15.7217
5	21	10	2.03	0.54	781250	3281250	0.238095	38.4221	55.8922	27.9183
3	26	25	2.65	0.51	187500	1625000	0.115385	19.0281	27.1468	16.5946
**********	**********	**********	**********	**********	**********	**********	**********	**********	**********	**********
345	2215	1113	2.18641	0.574872	484333	3.10956e+06	0.155756	36.4117	36.6181	2.64882
Pooled Ratio		0.155756	±	0.0112668
Mean Ratio		0.159403	±	0.00929503
Pooled Age		36.6181	±	2.64882	1 S.E.
Mean Crystal Age		37.473	±	2.1911	1 S.E.
Binomial Age		36.6942	+	4.32721	"+95%"
			-	4.08789	"-95%"
Central Age		37.1269	±	3.09731
Age Dispersion		19.0079	%
Chi-squared		39.1473	with	38	degrees of freedom
P (Chi-Sq)		41.8132	%
Sample Number		11 CAT 06 Apatite
Area of Graticule Square		6.4e-07	cm2
No. of Crystals		20
Zeta Factor ± Error		368.1	14.9
Rho d (% Relative Error)		1269000	1.56941
N d		4060
N s	N i	N g	Dpar	Dper	Rho s	Rho i	Rho s / Rho i	U ppm	Age (Ma)	Age error
10	116	36	1.7	0.45	434028	5.03472e+06	0.0862069	59.5121	20.1031	6.68273
4	42	35	1.92	0.57	178571	1875000	0.0952381	22.1631	22.2055	11.6593
6	60	40	1.97	0.41	234375	2343750	0.1	27.7039	23.3137	10.0335
8	105	25	1.89	0.48	500000	6562500	0.0761905	77.5709	17.7705	6.56327
12	133	25	1.94	0.49	750000	8312500	0.0902256	98.2565	21.0387	6.40685
6	76	32	1.9	0.47	292969	3.71094e+06	0.0789474	43.8645	18.4126	7.8488
9	121	32	1.62	0.46	439453	5.9082e+06	0.0743802	69.8369	17.3488	6.04129
5	78	25	1.94	0.58	312500	4875000	0.0641026	57.6241	14.9544	6.92932
6	76	42	1.56	0.63	223214	2.82738e+06	0.0789474	33.4206	18.4126	7.8488
5	70	30	1.57	0.52	260417	3.64583e+06	0.0714286	43.095	16.6613	7.74651
10	134	30	1.63	0.58	520833	6.97917e+06	0.0746269	82.4961	17.4063	5.75586
9	106	49	1.71	0.57	286990	3.3801e+06	0.0849057	39.9539	19.8001	6.92804
17	200	60	1.81	0.43	442708	5.20833e+06	0.085	61.5642	19.822	5.08111
5	74	50	2.22	0.49	156250	2312500	0.0675676	27.3345	15.7618	7.31519
4	57	35	2.04	0.52	178571	2.54464e+06	0.0701754	30.0785	16.3693	8.49675
9	123	30	1.63	0.4	468750	6406250	0.0731707	75.724	17.0671	5.93989
5	50	49	2.24	0.58	159439	1.59439e+06	0.1	18.8462	23.3137	10.9819
5	57	36	1.9	0.51	217014	2.47396e+06	0.0877193	29.243	20.4552	9.58186
14	178	42	1.94	0.58	520833	6.62202e+06	0.0786517	78.2745	18.3437	5.15362
12	136	60	1.9	0.47	312500	3.54167e+06	0.0882353	41.8637	20.5753	6.26014
**********	**********	**********	**********	**********	**********	**********	**********	**********	**********	**********
161	1992	763	1.8515	0.5095	329702	4.07929e+06	0.0808233	48.2186	18.8495	1.74782
Pooled Ratio		0.0808233	±	0.00749436
Mean Ratio		0.081286	±	0.00230652
Pooled Age		18.8495	±	1.74782	1 S.E.
Mean Crystal Age		18.9572	±	0.538687	1 S.E.
Binomial Age		18.9306	+	3.20646	"+95%"
			-	2.97481	"-95%"
Central Age		18.8495	±	1.74782
Age Dispersion		1.38485e-11	%
Chi-squared		1.69315	with	19	degrees of freedom
P (Chi-Sq)		100	%
Sample Number		11 CAT 07 Apatite
Area of Graticule Square		6.4e-07	cm2
No. of Crystals		20
Zeta Factor ± Error		368.1	14.9
Rho d (% Relative Error)		1257000	1.57681
N d		4022
N s	N i	N g	Dpar	Dper	Rho s	Rho i	Rho s / Rho i	U ppm	Age (Ma)	Age error
7	81	18	2.18	0.74	607639	7031250	0.0864198	83.9051	19.9623	7.91199
5	58	20	1.77	0.53	390625	4531250	0.0862069	54.0722	19.9133	9.32162
6	60	18	1.61	0.35	520833	5.20833e+06	0.1	62.1519	23.0937	9.93888
17	183	50	1.69	0.58	531250	5718750	0.0928962	68.2428	21.4559	5.51942
13	135	20	1.95	0.48	1015625	10546875	0.0962963	125.858	22.2398	6.53024
8	107	42	1.74	0.39	297619	3.98065e+06	0.0747664	47.5018	17.2741	6.37582
9	110	36	1.92	0.51	390625	4.77431e+06	0.0818182	56.9726	18.901	6.60424
4	60	25	1.65	0.43	250000	3750000	0.0666667	44.7494	15.405	7.98319
4	49	36	1.63	0.41	173611	2.12674e+06	0.0816327	25.3787	18.8582	9.84056
8	94	32	1.79	0.52	390625	4.58984e+06	0.0851064	54.7714	19.6594	7.29058
2	29	16	1.97	0.56	195312	2.83203e+06	0.0689655	33.7951	15.9355	11.6707
6	92	20	2.47	0.59	468750	7187500	0.0652174	85.7697	15.0705	6.38361
6	64	16	1.57	0.53	585938	6250000	0.09375	74.5823	21.6527	9.2925
3	39	20	1.82	0.47	234375	3046875	0.0769231	36.3589	17.7717	10.6758
6	69	60	1.91	0.56	156250	1796875	0.0869565	21.4424	20.0861	8.59364
6	94	49	1.74	0.37	191327	2.99745e+06	0.0638298	35.7691	14.7502	6.24391
9	131	30	1.74	0.46	468750	6.82292e+06	0.0687023	81.4191	15.8748	5.51364
4	40	20	1.79	0.31	312500	3125000	0.1	37.2912	23.0937	12.1519
9	105	25	1.82	0.46	562500	6562500	0.0857143	78.3115	19.7996	6.9305
13	149	48	2.01	0.46	423177	4.85026e+06	0.0872483	57.879	20.1534	5.89369
**********	**********	**********	**********	**********	**********	**********	**********	**********	**********	**********
145	1749	601	1.8385	0.4855	376976	4.54711e+06	0.0829045	54.2614	19.1516	1.8524
Pooled Ratio		0.0829045	±	0.00801881
Mean Ratio		0.0824558	±	0.00255967
Pooled Age		19.1516	±	1.8524	1 S.E.
Mean Crystal Age		19.0481	±	0.592155	1 S.E.
Binomial Age		19.2432	+	3.44795	"+95%"
			-	3.18472	"-95%"
Central Age		19.1516	±	1.8524
Age Dispersion		5.2894e-09	%
Chi-squared		2.29957	with	19	degrees of freedom
P (Chi-Sq)		99.9999	%
Sample Number		11 CAT 08 Apatite
Area of Graticule Square		6.4e-07	cm2
No. of Crystals		6
Zeta Factor ± Error		368.1	14.9
Rho d (% Relative Error)		1245000	1.58431
N d		3984
N s	N i	N g	Dpar	Dper	Rho s	Rho i	Rho s / Rho i	U ppm	Age (Ma)	Age error
6	59	15	1.6	0.37	625000	6.14583e+06	0.101695	74.0462	23.2606	10.0184
1	10	40	2.17	0.79	39062.5	390625	0.1	4.70633	22.8736	24.0106
12	46	36	2.25	0.78	520833	1.99653e+06	0.26087	24.0546	59.5008	19.4598
0	13	36	-	-	0	564236	0	6.79803	0	n/a
3	8	50	2.83	0.95	93750	250000	0.375	3.01205	85.3607	57.9085
13	83	100	2.86	0.77	203125	1296875	0.156627	15.625	35.7902	10.7883
**********	**********	**********	**********	**********	**********	**********	**********	**********	**********	**********
35	219	277	2.342	0.732	197428	1.23533e+06	0.159817	14.8835	36.5173	6.8344
Pooled Ratio		0.159817	±	0.0299107
Mean Ratio		0.165698	±	0.0544107
Pooled Age		36.5173	±	6.8344	1 S.E.
Mean Crystal Age		37.8571	±	12.4557	1 S.E.
Binomial Age		37.268	+	15.0158	"+95%"
			-	12.4505	"-95%"
Central Age		36.504	±	7.12482
Age Dispersion		10.6824	%
Chi-squared		7.43451	with	5	degrees of freedom
P (Chi-Sq)		19.0278	%
Sample Number		11 CAT 09 Apatite
Area of Graticule Square		6.4e-07	cm2
No. of Crystals		31
Zeta Factor ± Error		368.1	14.9
Rho d (% Relative Error)		1233000	1.59212
N d		3945
N s	N i	N g	Dpar	Dper	Rho s	Rho i	Rho s / Rho i	U ppm	Age (Ma)	Age error
5	20	16	2.18	0.43	488281	1953125	0.25	23.7606	56.4852	28.3493
5	16	40	2.69	0.65	195312	625000	0.3125	7.60341	70.5295	36.2656
13	61	80	3.13	1.08	253906	1.19141e+06	0.213115	14.494	48.1824	14.8671
3	15	28	2.9	0.88	167411	837054	0.2	10.1831	45.2277	28.6721
1	7	50	2.74	0.61	31250	218750	0.142857	2.66119	32.3378	34.5992
3	18	42	2.85	1.01	111607	669643	0.166667	8.14651	37.7118	23.5745
12	60	64	2.34	0.6	292969	1.46484e+06	0.2	17.8205	45.2277	14.4369
6	26	64	2.43	0.76	146484	634766	0.230769	7.72221	52.1577	23.7315
1	12	25	1.45	0.47	62500	750000	0.0833333	9.12409	18.8835	19.6717
5	32	42	2.71	0.8	186012	1.19048e+06	0.15625	14.4827	35.3612	17.0741
7	36	35	1.73	0.46	312500	1.60714e+06	0.194444	19.5516	43.9757	18.2659
8	43	30	1.76	0.56	416667	2.23958e+06	0.186047	27.2455	42.0826	16.3065
10	50	50	1.93	0.41	312500	1562500	0.2	19.0085	45.2277	15.7904
8	33	80	2.71	0.98	156250	644531	0.242424	7.84101	54.7808	21.7194
8	45	42	1.96	0.48	297619	1.67411e+06	0.177778	20.3663	40.218	15.5303
9	47	24	2.25	0.73	585937	3.0599e+06	0.191489	37.225	43.3096	15.8704
9	50	33	1.93	0.39	426136	2.36742e+06	0.18	28.8008	40.7192	14.8501
12	53	100	2.8	0.79	187500	828125	0.226415	10.0745	51.1775	16.5116
19	105	80	1.79	0.51	371094	2.05078e+06	0.180952	24.9487	40.9339	10.3594
13	79	70	2.79	0.68	290179	1.76339e+06	0.164557	21.4525	37.2358	11.2618
9	46	40	2.69	0.72	351562	1796875	0.195652	21.8598	44.2479	16.2422
2	7	50	3.92	1.3	62500	218750	0.285714	2.66119	64.5143	51.8026
19	81	50	2.06	0.55	593750	2531250	0.234568	30.7938	53.0128	13.7086
12	70	54	2.39	0.59	347222	2.02546e+06	0.171429	24.6407	38.786	12.2352
14	70	70	2.83	0.92	312500	1562500	0.2	19.0085	45.2277	13.3867
5	32	60	1.99	0.64	130208	833333	0.15625	10.1379	35.3612	17.0741
5	24	30	1.65	0.45	260417	1250000	0.208333	15.2068	47.1053	23.2473
4	20	24	2.49	0.71	260417	1.30208e+06	0.2	15.8404	45.2277	24.8502
15	58	40	2.69	0.82	585938	2265625	0.258621	27.5623	58.4242	17.1134
7	31	100	2.16	0.61	109375	484375	0.225806	5.89264	51.0405	21.4739
18	89	28	2.45	0.75	1.00446e+06	4.96652e+06	0.202247	60.4199	45.7341	11.9858
**********	**********	**********	**********	**********	**********	**********	**********	**********	**********	**********
267	1336	1541	2.39968	0.688387	270725	1.35464e+06	0.19985	16.4798	45.194	3.6115
Pooled Ratio		0.19985	±	0.0159703
Mean Ratio		0.201233	±	0.00782235
Pooled Age		45.194	±	3.6115	1 S.E.
Mean Crystal Age		45.5055	±	1.77491	1 S.E.
Binomial Age		45.3177	+	6.23453	"+95%"
			-	5.81989	"-95%"
Central Age		45.194	±	3.6115
Age Dispersion		1.08552e-07	%
Chi-squared		5.52138	with	30	degrees of freedom
P (Chi-Sq)		100	%
Sample Number		11 CAT 10 Apatite
Area of Graticule Square		6.4e-07	cm2
No. of Crystals		20
Zeta Factor ± Error		368.1	14.9
Rho d (% Relative Error)		1221000	1.59985
N d		3907
N s	N i	N g	Dpar	Dper	Rho s	Rho i	Rho s / Rho i	U ppm	Age (Ma)	Age error
3	7	64	3.5	1.02	73242.2	170898	0.428571	2.09949	95.5984	66.1002
6	37	60	2.21	0.7	156250	963542	0.162162	11.8371	36.3393	16.0712
4	19	40	2.81	1.03	156250	742188	0.210526	9.11778	47.1378	26.0125
4	35	60	3.01	1.13	104167	911458	0.114286	11.1973	25.6318	13.5744
36	134	100	2.37	0.71	562500	2093750	0.268657	25.7217	60.0929	11.5802
1	3	100	2.9	1.03	15625	46875	0.333333	0.57586	74.4765	86.0591
13	70	35	1.67	0.59	580357	3125000	0.185714	38.3907	41.6001	12.6934
12	57	64	2.88	0.96	292969	1.3916e+06	0.210526	17.0958	47.1378	15.1114
5	20	49	2.86	0.8	159439	637755	0.25	7.83483	55.9379	28.0747
4	14	49	2.69	0.88	127551	446429	0.285714	5.48438	63.8895	36.3285
6	36	100	3.3	1.08	93750	562500	0.166667	6.91032	37.3458	16.548
10	54	32	2.16	0.64	488281	2.63672e+06	0.185185	32.3921	41.482	14.3945
13	59	70	2.4	0.75	290179	1.31696e+06	0.220339	16.1789	49.3265	15.2647
15	80	100	3.54	1.51	234375	1250000	0.1875	15.3563	41.9988	11.9576
2	5	60	2.96	0.85	52083.3	130208	0.4	1.59961	89.2691	74.7889
10	55	64	3.64	1.35	244141	1.34277e+06	0.181818	16.496	40.7302	14.1138
16	88	30	1.83	0.81	833333	4.58333e+06	0.181818	56.3063	40.7302	11.2106
22	113	100	1.89	0.35	343750	1765625	0.19469	21.6907	43.604	10.3369
33	155	49	2.05	0.47	1.0523e+06	4.9426e+06	0.212903	60.7199	47.668	9.37123
9	35	70	2.84	0.96	200893	781250	0.257143	9.59767	57.529	21.6463
**********	**********	**********	**********	**********	**********	**********	**********	**********	**********	**********
224	1076	1296	2.6755	0.881	270062	1.29726e+06	0.208178	15.9369	46.614	3.97945
Pooled Ratio		0.208178	±	0.0177723
Mean Ratio		0.231878	±	0.0177323
Pooled Age		46.614	±	3.97945	1 S.E.
Mean Crystal Age		51.8993	±	3.98367	1 S.E.
Binomial Age		46.7667	+	7.08257	"+95%"
			-	6.56348	"-95%"
Central Age		46.614	±	3.97945
Age Dispersion		0.000774573	%
Chi-squared		7.41196	with	19	degrees of freedom
P (Chi-Sq)		99.1672	%
Sample Number		11 CAT 11 Apatite
Area of Graticule Square		6.4e-07	cm2
No. of Crystals		9
Zeta Factor ± Error		368.1	14.9
Rho d (% Relative Error)		1209000	1.60768
N d		3869
N s	N i	N g	Dpar	Dper	Rho s	Rho i	Rho s / Rho i	U ppm	Age (Ma)	Age error
28	112	100	2.39	0.77	437500	1750000	0.25	21.7122	55.3905	11.9494
10	42	40	4.17	1.5	390625	1640625	0.238095	20.3551	52.7636	18.7074
7	27	24	2.22	0.51	455729	1.75781e+06	0.259259	21.8091	57.4328	24.4876
2	4	100	2.68	0.87	31250	62500	0.5	0.775434	110.309	95.6512
18	32	36	2.34	0.56	781250	1.38889e+06	0.5625	17.2319	123.966	36.9207
3	12	48	2.25	0.9	97656.2	390625	0.25	4.84646	55.3905	35.8357
6	17	60	1.87	0.57	156250	442708	0.352941	5.49266	78.0607	37.2233
3	13	49	1.82	0.63	95663.3	414541	0.230769	5.14319	51.1465	32.8356
14	52	100	2.74	0.75	218750	812500	0.269231	10.0806	59.6316	18.1418
**********	**********	**********	**********	**********	**********	**********	**********	**********	**********	**********
91	311	557	2.49778	0.784444	255274	872419	0.292605	10.8241	64.7827	8.22036
Pooled Ratio		0.292605	±	0.037129
Mean Ratio		0.323644	±	0.0413168
Pooled Age		64.7827	±	8.22036	1 S.E.
Mean Crystal Age		71.6168	±	9.18711	1 S.E.
Binomial Age		65.3247	+	16.6435	"+95%"
			-	14.5587	"-95%"
Central Age		64.8295	±	8.26559
Age Dispersion		2.75262	%
Chi-squared		6.90266	with	8	degrees of freedom
P (Chi-Sq)		54.7171	%
Sample Number		11 CAT 12 Apatite
Area of Graticule Square		6.4e-07	cm2
No. of Crystals		20
Zeta Factor ± Error		368.1	14.9
Rho d (% Relative Error)		1197000	1.61564
N d		3831
N s	N i	N g	Dpar	Dper	Rho s	Rho i	Rho s / Rho i	U ppm	Age (Ma)	Age error
4	53	21	1.5	0.41	297619	3.94345e+06	0.0754717	49.4167	16.6056	8.64078
8	87	25	1.77	0.37	500000	5437500	0.091954	68.1391	20.2264	7.5245
5	60	15	1.57	0.42	520833	6250000	0.0833333	78.3208	18.3329	8.57082
3	38	12	1.34	0.37	390625	4.94792e+06	0.0789474	62.004	17.3693	10.444
3	44	15	1.65	0.42	312500	4.58333e+06	0.0681818	57.4353	15.0035	8.97657
4	33	9	1.32	0.45	694444	5.72917e+06	0.121212	71.7941	26.6488	14.1566
8	106	25	1.56	0.27	500000	6625000	0.0754717	83.0201	16.6056	6.13135
14	185	50	1.62	0.38	437500	5781250	0.0756757	72.4467	16.6504	4.67202
4	55	16	1.72	0.4	390625	5.37109e+06	0.0727273	67.3069	16.0025	8.3164
7	98	25	1.62	0.48	437500	6125000	0.0714286	76.7544	15.7171	6.18704
9	77	21	1.6	0.4	669643	5.72917e+06	0.116883	71.7941	25.699	9.12215
12	133	20	1.7	0.43	937500	10390625	0.0902256	130.208	19.8468	6.04438
5	52	16	1.75	0.54	488281	5078125	0.0961538	63.6357	21.1487	9.94508
16	167	40	1.63	0.41	625000	6.52344e+06	0.0958084	81.7473	21.0729	5.59077
6	68	20	1.61	0.4	468750	5312500	0.0882353	66.5727	19.4097	8.30934
5	70	18	1.7	0.35	434028	6.07639e+06	0.0714286	76.1452	15.7171	7.30778
9	136	24	1.6	0.47	585937	8.85417e+06	0.0661765	110.954	14.5627	5.05232
6	72	28	1.74	0.44	334821	4.01786e+06	0.0833333	50.3491	18.3329	7.83085
11	126	30	1.67	0.44	572917	6562500	0.0873016	82.2368	19.2046	6.09561
5	53	20	1.82	0.38	390625	4140625	0.0943396	51.8875	20.7503	9.74973
**********	**********	**********	**********	**********	**********	**********	**********	**********	**********	**********
144	1713	450	1.6245	0.4115	500000	5.94792e+06	0.084063	74.5353	18.4932	1.79562
Pooled Ratio		0.084063	±	0.00816222
Mean Ratio		0.0852145	±	0.00332996
Pooled Age		18.4932	±	1.79562	1 S.E.
Mean Crystal Age		18.7461	±	0.733576	1 S.E.
Binomial Age		18.5823	+	3.34403	"+95%"
			-	3.08731	"-95%"
Central Age		18.4932	±	1.79562
Age Dispersion		8.03069e-08	%
Chi-squared		3.1722	with	19	degrees of freedom
P (Chi-Sq)		99.9983	%
Sample Number		11 CAT 13 Apatite
Area of Graticule Square		6.4e-07	cm2
No. of Crystals		36
Zeta Factor ± Error		368.1	14.9
Rho d (% Relative Error)		1185000	1.62392
N d		3792
N s	N i	N g	Dpar	Dper	Rho s	Rho i	Rho s / Rho i	U ppm	Age (Ma)	Age error
9	48	15	2.06	0.48	937500	5000000	0.1875	63.2911	40.7644	14.9137
5	30	32	4.25	1.47	244141	1.46484e+06	0.166667	18.5423	36.2478	17.5806
17	143	20	2.18	0.56	1328125	11171875	0.118881	141.416	25.8759	6.73363
1	11	24	2.16	0.51	65104.2	716146	0.0909091	9.06514	19.7968	20.6951
3	30	50	2.82	0.89	93750	937500	0.1	11.8671	21.7731	13.2184
3	35	30	2.29	0.85	156250	1.82292e+06	0.0857143	23.0749	18.6672	11.2594
3	29	24	2.27	0.7	195312	1.88802e+06	0.103448	23.899	22.5226	13.6947
3	17	25	1.31	0.32	187500	1062500	0.176471	13.4494	38.3737	24.0887
2	6	15	2.1	0.42	208333	625000	0.333333	7.91139	72.2929	59.111
16	106	100	1.57	0.32	250000	1656250	0.150943	20.9652	32.8369	8.9227
17	104	36	1.61	0.58	737847	4.51389e+06	0.163462	57.1378	35.5526	9.42923
11	45	70	2.79	0.63	245536	1.00446e+06	0.244444	12.7147	53.0939	18.0076
4	15	50	2.45	0.72	125000	468750	0.266667	5.93354	57.899	32.6793
3	13	42	2.44	0.59	111607	483631	0.230769	6.12191	50.1351	32.1865
2	6	21	2.04	0.41	148810	446429	0.333333	5.65099	72.2929	59.111
2	25	50	2.7	0.63	62500	781250	0.08	9.88924	17.4244	12.8268
5	48	25	2.12	0.58	312500	3000000	0.104167	37.9747	22.6787	10.7032
3	18	50	2.55	0.64	93750	562500	0.166667	7.12025	36.2478	22.6597
17	83	100	3.06	0.95	265625	1296875	0.204819	16.4161	44.5169	12.0092
3	12	28	2.85	0.75	167411	669643	0.25	8.47649	54.2955	35.1275
4	40	20	2.57	0.63	312500	3125000	0.1	39.557	21.7731	11.4573
4	13	24	2.75	0.72	260417	846354	0.307692	10.7133	66.7606	38.2827
4	29	60	2.76	0.73	104167	755208	0.137931	9.5596	30.0127	16.0613
2	10	36	2.91	1.01	86805.6	434028	0.2	5.49402	43.4729	33.7273
3	17	49	2.7	0.76	95663.3	542092	0.176471	6.86192	38.3737	24.0887
2	9	20	2.28	0.64	156250	703125	0.222222	8.90032	48.2852	37.805
3	19	36	2.73	0.94	130208	824653	0.157895	10.4386	34.3451	21.3898
1	14	50	2.56	0.66	31250	437500	0.0714286	5.53797	15.5597	16.1201
5	18	50	2.46	0.69	156250	562500	0.277778	7.12025	60.3002	30.5965
4	27	40	1.86	0.43	156250	1.05469e+06	0.148148	13.3505	32.2303	17.3248
8	41	35	3.42	1.13	357143	1.83036e+06	0.195122	23.1691	42.4161	16.4983
5	45	28	1.73	0.34	279018	2.51116e+06	0.111111	31.7868	24.1878	11.4509
2	24	40	2.2	0.72	78125	937500	0.0833333	11.8671	18.1494	13.381
6	24	60	2.55	0.89	156250	625000	0.25	7.91139	54.2955	24.8953
3	7	25	2.71	0.68	187500	437500	0.428571	5.53797	92.7999	64.1658
14	138	40	2.08	0.58	546875	5390625	0.101449	68.2358	22.0881	6.26996
**********	**********	**********	**********	**********	**********	**********	**********	**********	**********	**********
199	1299	1420	2.44139	0.681944	218970	1.42936e+06	0.153195	18.0931	33.3254	2.92375
Pooled Ratio		0.153195	±	0.0134403
Mean Ratio		0.181315	±	0.014185
Pooled Age		33.3254	±	2.92375	1 S.E.
Mean Crystal Age		39.4239	±	3.09301	1 S.E.
Binomial Age		33.4453	+	5.25463	"+95%"
			-	4.87396	"-95%"
Central Age		33.3267	±	2.92435
Age Dispersion		0.634836	%
Chi-squared		24.1785	with	35	degrees of freedom
P (Chi-Sq)		91.5512	%
Sample Number		11 CAT 14 Apatite
Area of Graticule Square		6.4e-07	cm2
No. of Crystals		5
Zeta Factor ± Error		368.1	14.9
Rho d (% Relative Error)		1173000	1.63212
N d		3754
N s	N i	N g	Dpar	Dper	Rho s	Rho i	Rho s / Rho i	U ppm	Age (Ma)	Age error
4	19	49	1.85	0.57	127551	605867	0.210526	7.74766	45.2912	24.9939
19	37	80	2.88	0.81	371094	722656	0.513514	9.24113	109.92	31.3925
26	47	100	2.53	0.85	406250	734375	0.553191	9.39098	118.336	29.3805
3	7	50	2.5	0.93	93750	218750	0.428571	2.79731	91.8669	63.5208
7	18	36	3.15	0.87	303819	781250	0.388889	9.99041	83.4154	37.3341
**********	**********	**********	**********	**********	**********	**********	**********	**********	**********	**********
59	128	315	2.582	0.806	292659	634921	0.460938	8.11919	98.7518	16.1261
Pooled Ratio		0.460938	±	0.0752706
Mean Ratio		0.418938	±	0.0597494
Pooled Age		98.7518	±	16.1261	1 S.E.
Mean Crystal Age		89.8163	±	12.8864	1 S.E.
Binomial Age		100.118	+	34.9455	"+95%"
			-	28.689	"-95%"
Central Age		98.7518	±	16.1261
Age Dispersion		0.020411	%
Chi-squared		2.99765	with	4	degrees of freedom
P (Chi-Sq)		55.8218	%
Sample Number		11 CAT 15 Apatite
Area of Graticule Square		6.4e-07	cm2
No. of Crystals		30
Zeta Factor ± Error		368.1	14.9
Rho d (% Relative Error)		1161000	1.64045
N d		3716
N s	N i	N g	Dpar	Dper	Rho s	Rho i	Rho s / Rho i	U ppm	Age (Ma)	Age error
14	69	16	2.92	0.89	1.36719e+06	6.73828e+06	0.202899	87.0579	43.2106	12.8059
17	104	42	1.89	0.89	632440	3.86905e+06	0.163462	49.9877	34.8345	9.23913
12	74	20	2.08	0.56	937500	5781250	0.162162	74.6932	34.5583	10.86
5	36	36	1.84	0.42	217014	1562500	0.138889	20.1873	29.61	14.1907
18	58	48	2.49	0.5	585937	1.88802e+06	0.310345	24.393	65.9763	18.0327
6	38	49	1.63	0.4	191327	1.21173e+06	0.157895	15.6555	33.6513	14.8558
12	57	18	2.4	0.52	1.04167e+06	4.94792e+06	0.210526	63.9266	44.8295	14.3724
11	60	50	2.9	0.93	343750	1875000	0.183333	24.2248	39.0565	12.9231
7	56	100	1.64	0.43	109375	875000	0.125	11.3049	26.6551	10.749
13	66	50	2.18	0.66	406250	2062500	0.19697	26.6473	41.9521	12.861
29	144	25	2.99	1.04	1812500	9000000	0.201389	116.279	42.8902	8.92846
19	94	35	1.88	0.52	848214	4.19643e+06	0.202128	54.2174	43.047	10.9898
20	97	25	1.63	0.51	1250000	6062500	0.206186	78.3269	43.9083	10.9522
33	156	40	1.76	0.56	1.28906e+06	6093750	0.211538	78.7306	45.0442	8.85218
6	27	48	2.14	0.42	195312	878906	0.222222	11.3554	47.3109	21.4528
5	17	32	1.94	0.49	244141	830078	0.294118	10.7245	62.5433	31.9357
6	54	36	1.71	0.37	260417	2343750	0.111111	30.281	23.6988	10.2507
14	68	70	1.81	0.41	312500	1.51786e+06	0.205882	19.6106	43.8439	13.0093
6	54	42	1.92	0.37	223214	2.00893e+06	0.111111	25.9551	23.6988	10.2507
18	69	50	1.78	0.42	562500	2156250	0.26087	27.8585	55.5035	14.8886
57	312	20	2.12	0.64	4453125	24375000	0.182692	314.922	38.9203	5.85833
19	131	36	1.91	0.47	824653	5.68576e+06	0.145038	73.4595	30.9178	7.70919
7	34	20	1.79	0.42	546875	2656250	0.205882	34.3185	43.8439	18.298
16	90	40	2.81	0.61	625000	3515625	0.177778	45.4215	37.8764	10.4087
15	76	60	2.03	0.47	390625	1.97917e+06	0.197368	25.5706	42.0367	12.0178
14	77	36	1.74	0.4	607639	3.34201e+06	0.181818	43.1785	38.7347	11.3806
31	204	49	2.21	0.46	988520	6.5051e+06	0.151961	84.0452	32.3898	6.40201
13	71	80	2.12	0.54	253906	1.38672e+06	0.183099	17.9163	39.0066	11.89
20	103	36	2.21	0.52	868056	4.47049e+06	0.194175	57.7582	41.3587	10.2663
8	43	42	2.32	0.58	297619	1.5997e+06	0.186047	20.668	39.6327	15.358
**********	**********	**********	**********	**********	**********	**********	**********	**********	**********	**********
471	2539	1251	2.093	0.547333	588279	3.17121e+06	0.185506	40.9717	39.5179	2.62864
Pooled Ratio		0.185506	±	0.0123394
Mean Ratio		0.189463	±	0.00825115
Pooled Age		39.5179	±	2.62864	1 S.E.
Mean Crystal Age		40.3583	±	1.76288	1 S.E.
Binomial Age		39.5789	+	4.02595	"+95%"
			-	3.82734	"-95%"
Central Age		39.5179	±	2.62864
Age Dispersion		0.00205277	%
Chi-squared		14.826	with	29	degrees of freedom
P (Chi-Sq)		98.6324	%
Sample Number		11 CAT 16 Apatite
Area of Graticule Square		6.4e-07	cm2
No. of Crystals		28
Zeta Factor ± Error		368.1	14.9
Rho d (% Relative Error)		1149000	1.6489
N d		3678
N s	N i	N g	Dpar	Dper	Rho s	Rho i	Rho s / Rho i	U ppm	Age (Ma)	Age error
9	43	25	1.88	0.41	562500	2687500	0.209302	35.0849	44.1106	16.2838
3	27	30	2.45	0.79	156250	1406250	0.111111	18.3584	23.4543	14.3106
13	64	18	1.57	0.37	1.12847e+06	5.55556e+06	0.203125	72.5268	42.8131	13.1582
12	68	20	1.77	0.53	937500	5312500	0.176471	69.3538	37.2112	11.7643
6	43	64	2.04	0.76	146484	1.0498e+06	0.139535	13.705	29.4406	12.8946
16	107	15	1.73	0.46	1.66667e+06	1.11458e+07	0.149533	145.507	31.5449	8.56699
11	52	25	1.53	0.44	687500	3250000	0.211538	42.4282	44.5803	14.9228
4	17	40	2.91	0.73	156250	664062	0.235294	8.66922	49.5674	27.6306
7	54	64	1.83	0.55	170898	1.31836e+06	0.12963	17.211	27.3551	11.0538
10	66	40	1.91	0.43	390625	2578125	0.151515	33.657	31.9621	10.9356
13	64	50	2.91	0.91	406250	2000000	0.203125	26.1097	42.8131	13.1582
5	27	80	2.03	0.47	97656.2	527344	0.185185	6.88438	39.0433	19.0852
15	89	35	1.86	0.46	669643	3.97321e+06	0.168539	51.8696	35.5434	10.0414
7	28	56	2.58	0.81	195312	781250	0.25	10.1991	52.6527	22.3685
12	49	20	1.74	0.41	937500	3828125	0.244898	49.9755	51.5825	16.7664
4	15	35	1.66	0.42	178571	669643	0.266667	8.74207	56.1477	31.6912
5	21	50	3.65	1.39	156250	656250	0.238095	8.56723	50.1552	25.054
14	64	49	2.32	0.64	446429	2.04082e+06	0.21875	26.6425	46.0946	13.7486
7	59	60	2.78	0.75	182292	1.53646e+06	0.118644	20.0582	25.0414	10.0701
15	116	30	1.7	0.43	781250	6.04167e+06	0.12931	78.8729	27.2879	7.58179
13	56	24	2.22	0.43	846354	3.64583e+06	0.232143	47.5957	48.9061	15.2074
12	70	49	2.15	0.57	382653	2.23214e+06	0.171429	29.1402	36.151	11.405
46	273	64	2.02	0.45	1.12305e+06	6.66504e+06	0.168498	87.011	35.5348	5.87265
7	25	60	2.33	0.49	182292	651042	0.28	8.49924	58.9423	25.3361
20	127	60	1.69	0.45	520833	3.30729e+06	0.15748	43.1761	33.2172	8.12188
7	40	50	1.64	0.37	218750	1250000	0.175	16.3185	36.902	15.2047
7	33	42	3	0.83	260417	1.22768e+06	0.212121	16.0271	44.7027	18.7042
35	196	80	1.98	0.47	683594	3828125	0.178571	49.9755	37.6529	7.10273
**********	**********	**********	**********	**********	**********	**********	**********	**********	**********	**********
335	1893	1235	2.13857	0.579286	423836	2.39499e+06	0.176968	31.2662	37.3158	2.74815
Pooled Ratio		0.176968	±	0.0130329
Mean Ratio		0.18984	±	0.00863915
Pooled Age		37.3158	±	2.74815	1 S.E.
Mean Crystal Age		40.0216	±	1.82669	1 S.E.
Binomial Age		37.3964	+	4.52345	"+95%"
			-	4.26204	"-95%"
Central Age		37.3158	±	2.74815
Age Dispersion		0.000126675	%
Chi-squared		11.2559	with	27	degrees of freedom
P (Chi-Sq)		99.6643	%
Sample Number		11 CAT 17 Apatite
Area of Graticule Square		6.4e-07	cm2
No. of Crystals		25
Zeta Factor ± Error		368.1	14.9
Rho d (% Relative Error)		1137000	1.65771
N d		3639
N s	N i	N g	Dpar	Dper	Rho s	Rho i	Rho s / Rho i	U ppm	Age (Ma)	Age error
4	38	36	2.09	0.62	173611	1.64931e+06	0.105263	21.7586	21.9903	11.5993
3	54	42	1.57	0.38	111607	2.00893e+06	0.0555556	26.503	11.6154	6.9086
4	41	28	2.04	0.53	223214	2.28795e+06	0.097561	30.184	20.3838	10.7147
19	123	12	3.85	1.13	2.47396e+06	1.60156e+07	0.154472	211.288	32.2447	8.07245
2	10	20	1.74	0.57	156250	781250	0.2	10.3067	41.7177	32.3659
3	29	25	1.84	0.58	187500	1812500	0.103448	23.9116	21.6118	13.1411
4	39	20	1.6	0.47	312500	3046875	0.102564	40.1962	21.4274	11.2887
2	22	12	1.74	0.48	260417	2.86458e+06	0.0909091	37.7913	18.9961	14.0541
6	60	24	1.93	0.48	390625	3.90625e+06	0.1	51.5336	20.8926	8.99223
3	27	20	3	0.76	234375	2109375	0.111111	27.8282	23.2098	14.1615
4	38	15	2.42	0.6	416667	3.95833e+06	0.105263	52.2208	21.9903	11.5993
2	29	12	1.77	0.57	260417	3.77604e+06	0.0689655	49.8159	14.4159	10.5581
7	71	50	1.88	0.48	218750	2218750	0.0985915	29.2711	20.5988	8.20998
21	138	49	2.44	0.79	669643	4.40051e+06	0.152174	58.0542	31.7663	7.56935
6	41	50	2.28	0.66	187500	1281250	0.146341	16.903	30.5516	13.4208
10	74	24	2.33	0.58	651042	4.81771e+06	0.135135	63.5582	28.2172	9.58665
5	55	21	1.47	0.55	372024	4.09226e+06	0.0909091	53.9876	18.9961	8.91187
11	96	30	1.64	0.52	572917	5000000	0.114583	65.9631	23.9338	7.69012
6	34	30	2.5	0.65	312500	1.77083e+06	0.176471	23.3619	36.8237	16.3852
12	85	70	2.7	0.88	267857	1.89732e+06	0.141176	25.0306	29.4758	9.18072
18	128	60	2.93	0.82	468750	3.33333e+06	0.140625	43.9754	29.3609	7.50177
20	88	24	3.6	0.89	1.30208e+06	5.72917e+06	0.227273	75.5827	47.3856	11.9198
32	260	16	3.98	1.16	3125000	25390625	0.123077	334.969	25.7044	4.94496
34	184	35	2.84	0.81	1.51786e+06	8.21429e+06	0.184783	108.368	38.553	7.39171
30	290	50	1.99	0.6	937500	9062500	0.103448	119.558	21.6118	4.25126
**********	**********	**********	**********	**********	**********	**********	**********	**********	**********	**********
268	2054	775	2.3268	0.6624	540323	4.14113e+06	0.130477	54.6323	27.2466	2.13351
Pooled Ratio		0.130477	±	0.0102168
Mean Ratio		0.125188	±	0.00815032
Pooled Age		27.2466	±	2.13351	1 S.E.
Mean Crystal Age		26.1444	±	1.70535	1 S.E.
Binomial Age		27.3187	+	3.63253	"+95%"
			-	3.41246	"-95%"
Central Age		27.2419	±	2.15412
Age Dispersion		4.13257	%
Chi-squared		18.1077	with	24	degrees of freedom
P (Chi-Sq)		79.7752	%
Sample Number		UK25 Apatite
Area of Graticule Square		6.4e-07	cm2
No. of Crystals		11
Zeta Factor ± Error		351.9	3.8
Rho d (% Relative Error)		1483000	1.45156
N d		4746
N s	N i	N g	Dpar	Dper	ρ s	ρ i	ρ s / ρ i	U ppm	Age (Ma)	Age error
8	45	60	2.97	0.97	208333	1171875	0.177778	11.8531	46.2221	17.7549
9	37	80	2.8	1.07	175781	722656	0.243243	7.3094	63.16	23.5024
6	41	50	2.98	0.73	187500	1281250	0.146341	12.9594	38.0728	16.6559
4	30	80	3.18	0.94	78125	585938	0.133333	5.92654	34.6976	18.4799
9	39	80	3.27	0.69	175781	761719	0.230769	7.70451	59.936	22.1909
11	44	100	3.22	1	171875	687500	0.25	6.95381	64.9056	21.9112
15	69	100	3.28	0.7	234375	1078125	0.217391	10.9048	56.4766	16.1218
18	87	100	3.44	0.88	281250	1359375	0.206897	13.7496	53.7615	13.9549
11	57	100	3.38	0.91	171875	890625	0.192982	9.00834	50.16	16.5437
8	35	60	3.52	0.94	208333	911458	0.228571	9.21907	59.3678	23.29
9	40	60	3.06	0.95	234375	1.04167e+06	0.225	10.5361	58.4444	21.5879
**********	**********	**********	**********	**********	**********	**********	**********	**********	**********	**********
108	524	870	3.19091	0.889091	193966	941092	0.206107	9.5188	53.5572	5.74211
Pooled Ratio		0.206107	±	0.0220977
Mean Ratio		0.204755	±	0.0115704
Pooled Age		53.5572	±	5.74211	1 S.E.
Mean Crystal Age		53.2074	±	3.0184	1 S.E.
Binomial Age		53.9206	+	12.0147	"+95%"
			-	10.7592	"-95%"
Central Age		53.5572	±	5.74211
Age Dispersion		2.26878e-11	%
Chi-squared		2.27194	with	10	degrees of freedom
P (Chi-Sq)		99.3799	%
